# Supplementary material
Source: PubMed Central journal article supplement (PMC9553956)
Supplement: 41421_2022_473_MOESM1_ESM.pdf [file 41421_2022_473_MOESM1_ESM.pdf]

1 **Supplementary information**

2

3 Fang et al.

4

5 Bivalent mRNA vaccine booster induces robust antibody immunity against Omicron subvariants BA.2,  
6 BA.2.12.1, BA.2.75 and BA.5

7

8 **Inventory of supporting information**

9 Supplementary discussion, figures, legends and methods

10

11 **Supplementary source data and statistics**

12 Provided in excel file, "Supplementary table S1.xlsx".

**13 Supplementary discussions****14 Limitations of study**

15 The vaccine-mediated immune response was exclusively evaluated in mice to ensure sufficient sample  
16 size and comparable genetic background. It must also be noted that, although the innate and adaptive  
17 immune system are generally conserved in mammals, mouse, NHPs and human are different species and  
18 have differences in various ways. Findings in this study is limited to preclinical mouse models, where  
19 further investigation in non-human primates (NHP) and/or potential human clinical trials are critical for  
20 future translational studies. The dosing interval between 2<sup>nd</sup> and 3<sup>rd</sup> dose in this study is 14 days, which is  
21 shorter than >6-month interval for boosters in human. A few studies demonstrated that a delayed dosing  
22 strategy improves the antibody neutralization titers against a panel of SARS-CoV-2 variants<sup>1,2</sup>, whereas  
23 the relative titer difference between variants remains unchanged in short and extended dosing schemes.  
24 Some of antibody titer comparisons showed a trend of difference, but did not reach statistical significance  
25 due to variations and limited sample size. The insignificant results lower confidence of making related  
26 conclusions and should be interpreted together with results from companion assays to increase reliability  
27 of conclusions (ELISA, pseudovirus and authentic virus neutralization assays). In addition, the limited case  
28 number of BA.2.75 in North America makes it difficult to isolate this BA.2.75 strain and perform BA.2.75  
29 authentic virus neutralization assay. The pseudovirus neutralization titers were correlated with authentic  
30 virus neutralization titers, but were often higher than authentic virus titers (overestimate the titers,  
31 **Supplementary Fig. 10**).

32

**33 Additional background introduction**

34 Omicron BA.4 and BA.5 lineages are thought to have emerged together with BA.1 and BA.2 and were first  
35 found in early 2022 in samples from Southern Africa<sup>3</sup>. These Omicron lineages quickly replaced its  
36 predecessors in populations with high previous antigen exposure from vaccination or infection of past  
37 variants. Compared to BA.2 spike, BA.2.12.1 contains two additional amino acid substitutions (L452Q and  
38 S704L) while BA.4 and BA.5 spikes are identical with four consistent substitutions (Del69-70, L452R, F486V,  
39 R493Q) plus one substitution (N658S) detected in earlier sequences. Compared to BA.2 spike sequence,  
40 BA.2.75 carries 9 additional amino acid substitutions, including K147E, W152R, F157L, I210V and G257S  
41 on N-terminal domain, and D339H, G446S, N460K and R493Q on the spike RBD region.

42

43 **Supplementary figures and legends**

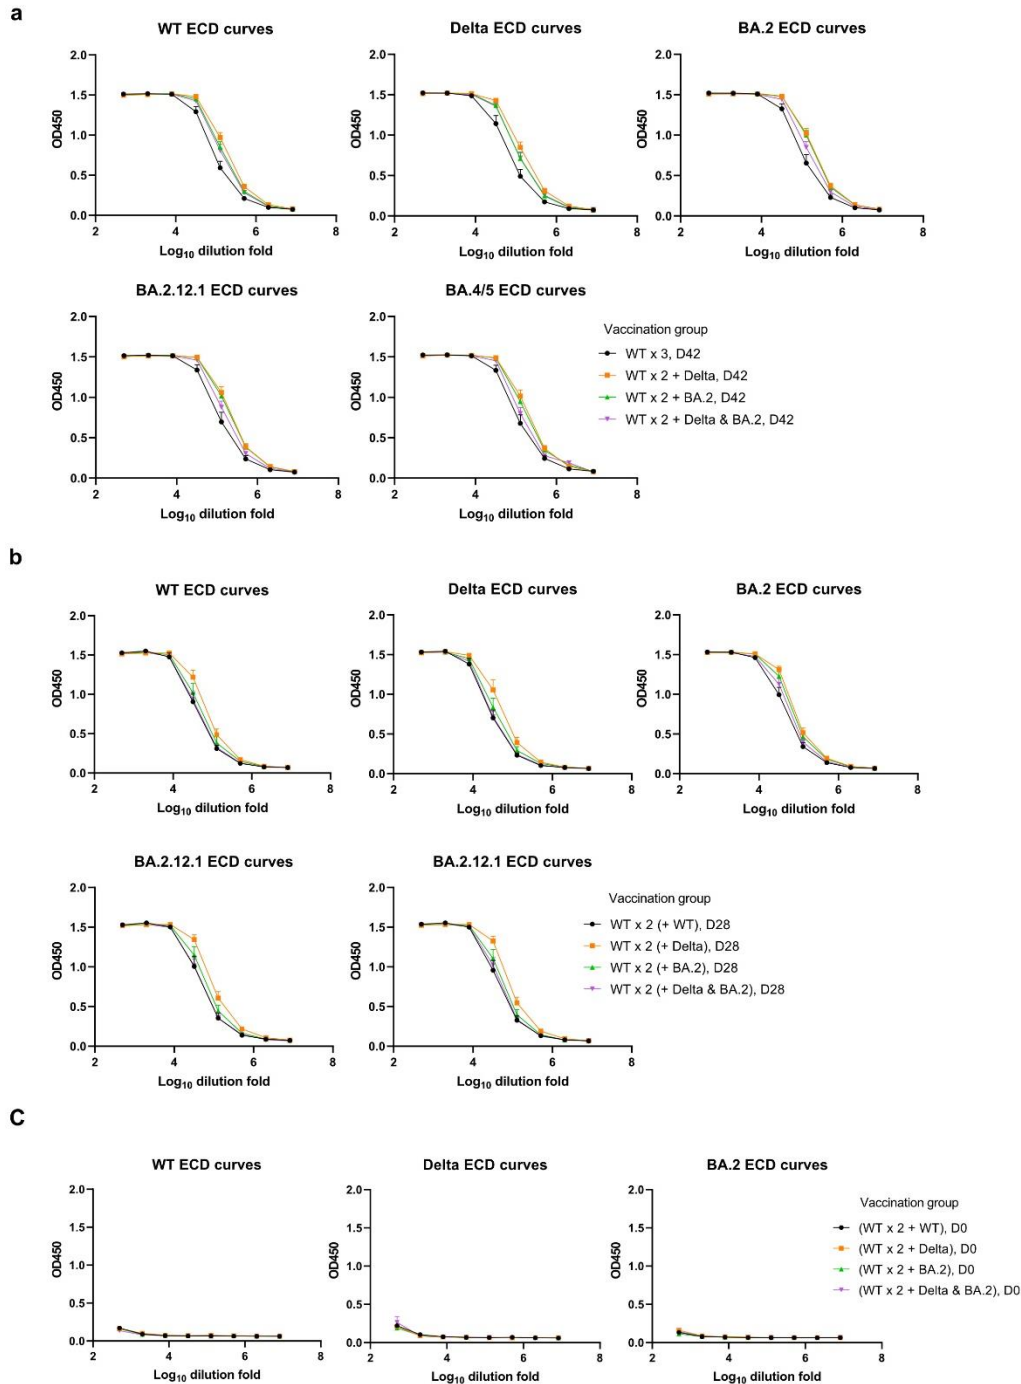

44

45 **Supplementary Figure S1. Plasma dilution-dependent ELISA response curves against WT, Delta, BA.2,**  
 46 **BA.2.12.1 and BA4/5 spike ECDs.** Plasma samples were collected at day 42 (a), day 28 (b) and day 0 (c)  
 47 from mice immunized with WT Delta, BA.2 specific monovalent or bivalent LNP-mRNA boosters.

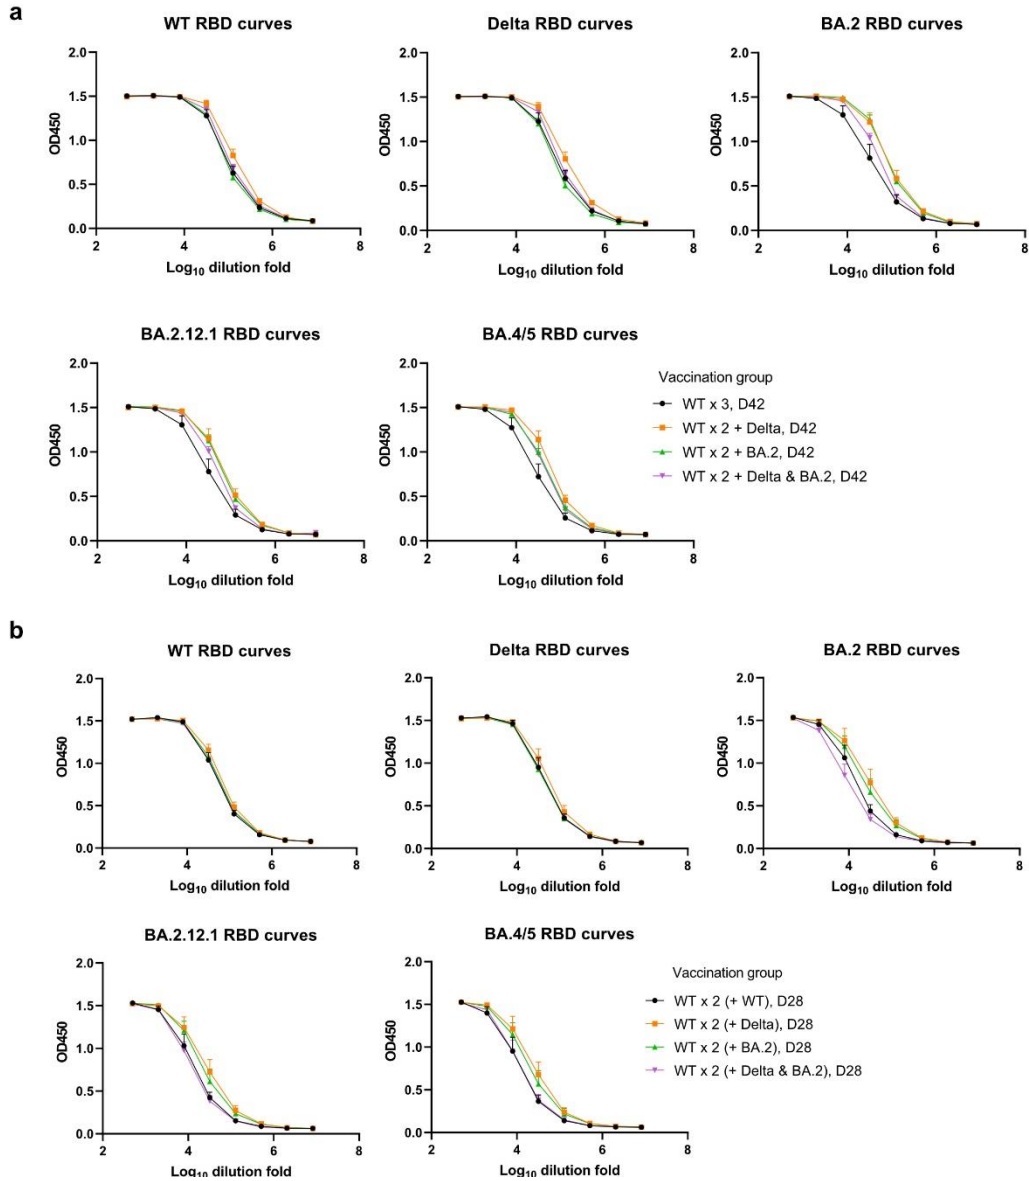

48

49 **Supplementary Figure S2. Plasma dilution-dependent ELISA response curves against WT, Delta, BA.2,**  
 50 **BA.2.12.1 and BA4/5 spike RBDs.** Plasma samples were collected at day 42 (a) and day 28 (b) from mice  
 51 immunized with WT Delta, BA.2 specific monovalent or bivalent LNP-mRNA boosters.

52

53

a

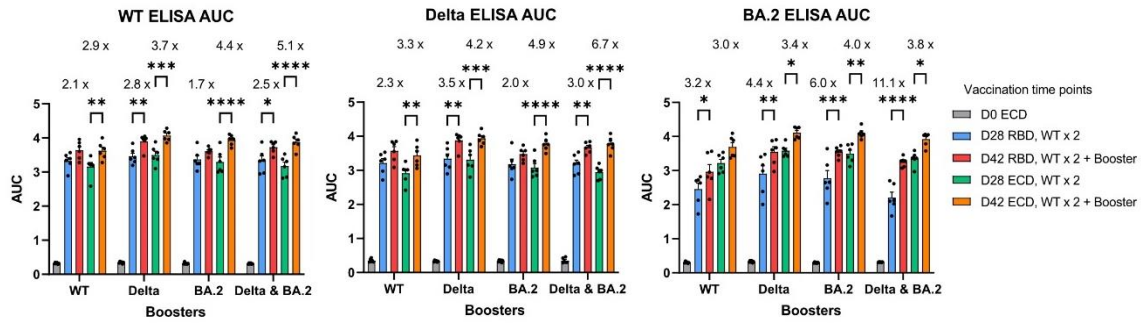

54

55 **Supplementary Figure S3. Comparison of binding antibody titers against WT (left), Delta (Mid) and BA.2**  
 56 **(Right) spike RBD and ECD before (D0 and D28) and after (D42) receiving 1.5 µg WT, Delta, BA.2 specific**  
 57 **monovalent or bivalent (1.5 µg Delta + 1.5 µg BA.2) LNP-mRNA boosters (n = 6). Antibody titers were**  
 58 **quantified by area under curves (AUC) of ELISA response curves in Figure S1 and S2. The comparison with**  
 59 **day 0 samples and insignificant comparison were not shown.**

60

61

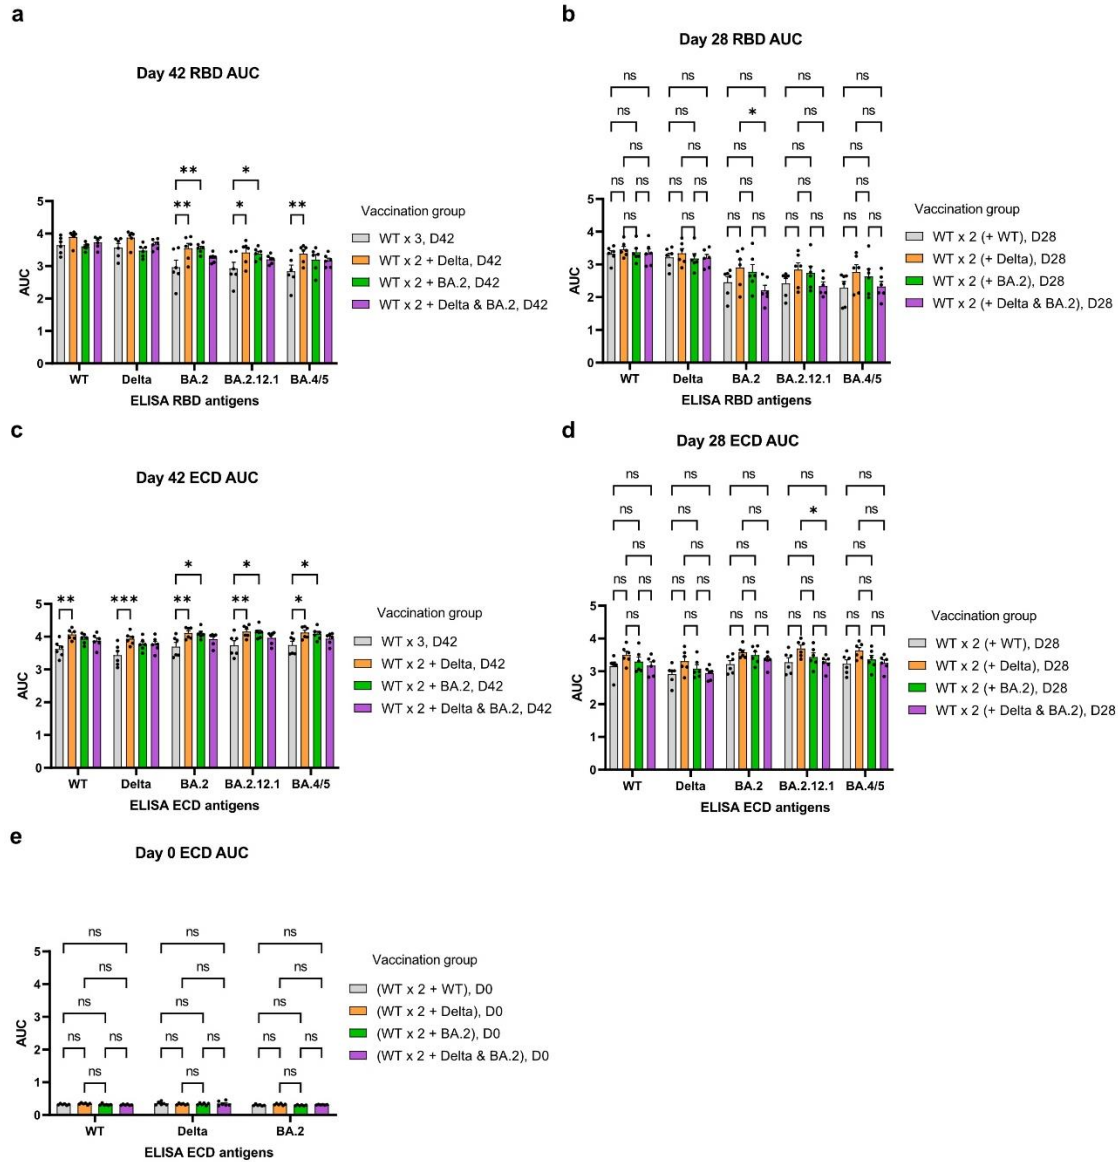

62

63 **Supplementary Figure S4. Comparison of ELISA antibody titers of plasma samples collected on day 0,**  
 64 **day 28 and day 42.**

65 **a-b,** ELISA antibody titers against WT, Delta, BA.2, BA.2.12.1 and BA.4/5 spike RBDs before (D28, b) and  
 66 after (D42, a) receiving 1.5 µg WT, Delta, BA.2 specific monovalent or bivalent (1.5 µg Delta + 1.5 µg BA.2)  
 67 LNP-mRNA boosters.

68 **c-e,** ELISA antibody titers against WT, Delta, BA.2, BA.2.12.1 and BA.4/5 spike ECDs by plasma samples  
 69 collected on (D42, c; D28, d; D0, e).

70 Antibody titers were quantified by area under curves (AUC) of ELISA response curves in Figure S1 and S2.

a

RBD ECD correlations of BA.2, BA.2.12.1, BA4/5

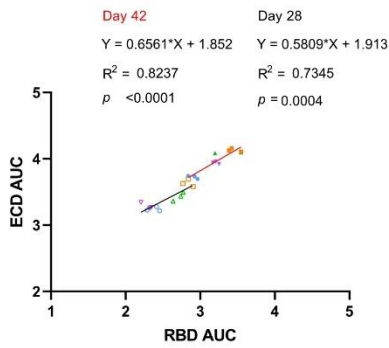

RBD ECD correlations of WT and Delta

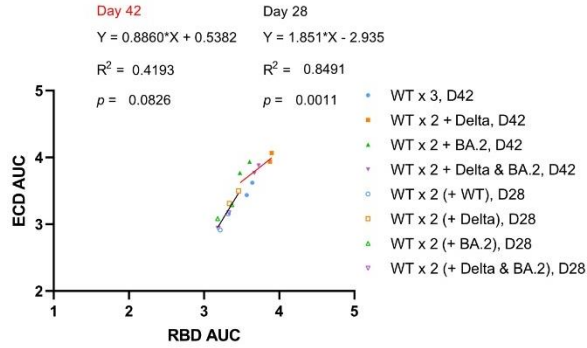

b

RBD ECD correlations of BA.2, BA.2.12.1, BA4/5

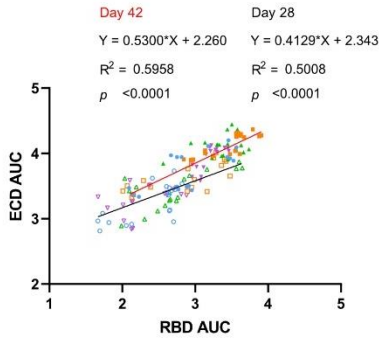

RBD ECD correlations of WT and Delta

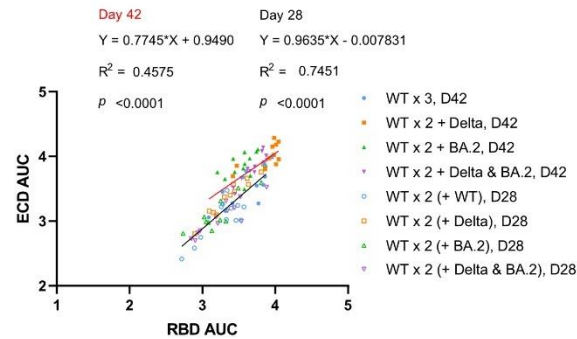

71

72 **Supplementary Figure S5. Correlation of antibody titers against RBD and ECD of five spike antigens in**

73 **ELISA.** Antibody titers against ECD of Omicron BA.2, BA.2.12.1, BA.4/5 subvariants (left) or WT, Delta

74 (right) were shown on y axis as  $\log_{10}$  AUC and plotted against corresponding RBD binding antibody titers

75 on x axis ( $\log_{10}$  AUC). Titers were either shown as mean of matched vaccination group (a) or derived

76 from individual animal (b).

77

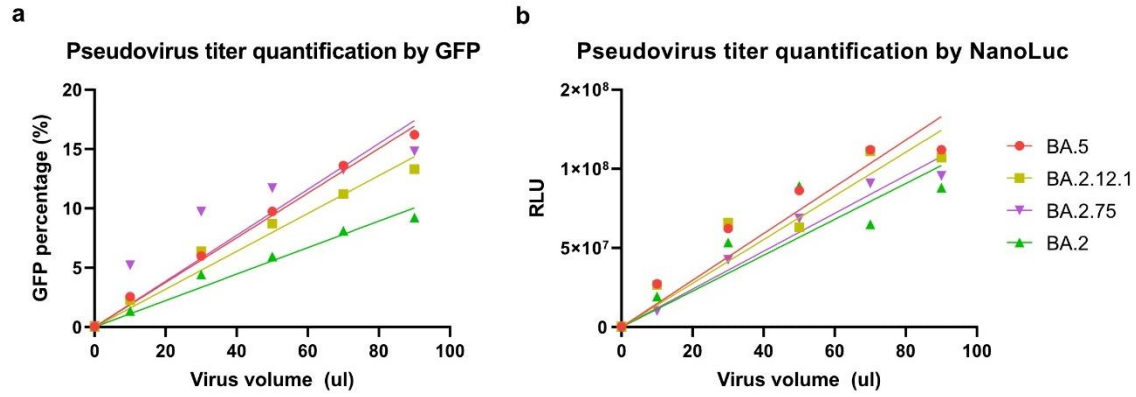

78

79 **Supplementary Figure S6. Pseudovirus titer quantification by measuring GFP positive rate (a) and**  
 80 **NanoLuciferase activity (b).**

81 **a-b**, Different volume of pseudovirus was added to 293T-hACE2 cells, of which GFP positive rate (a) and  
 82 Nanoluciferase activity (b) as a proxy of infection rate were measured.



**a**

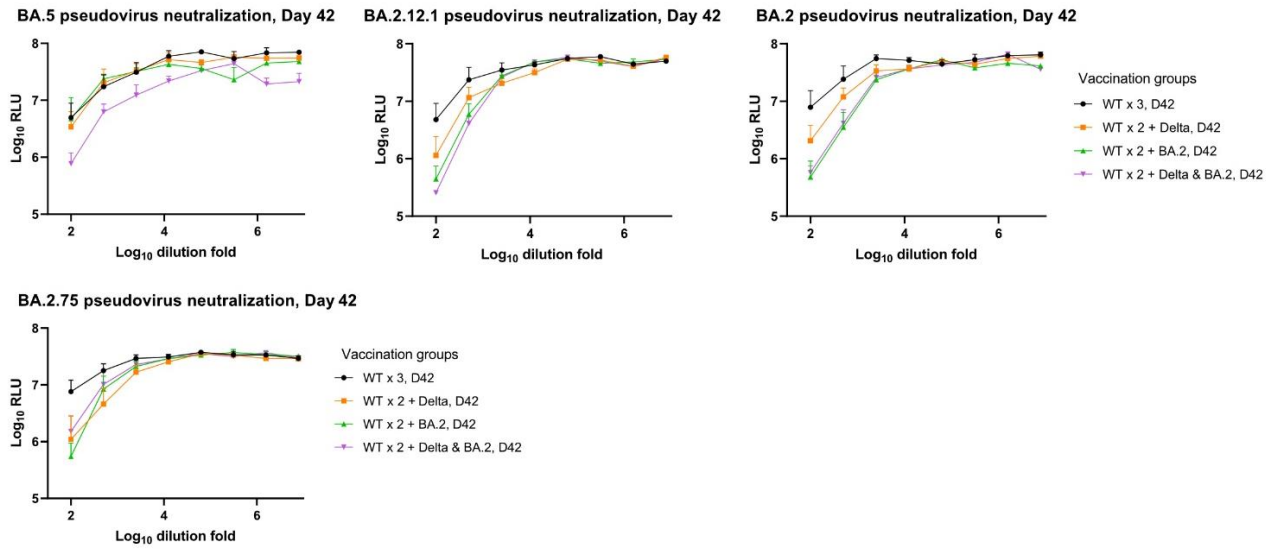

**b**

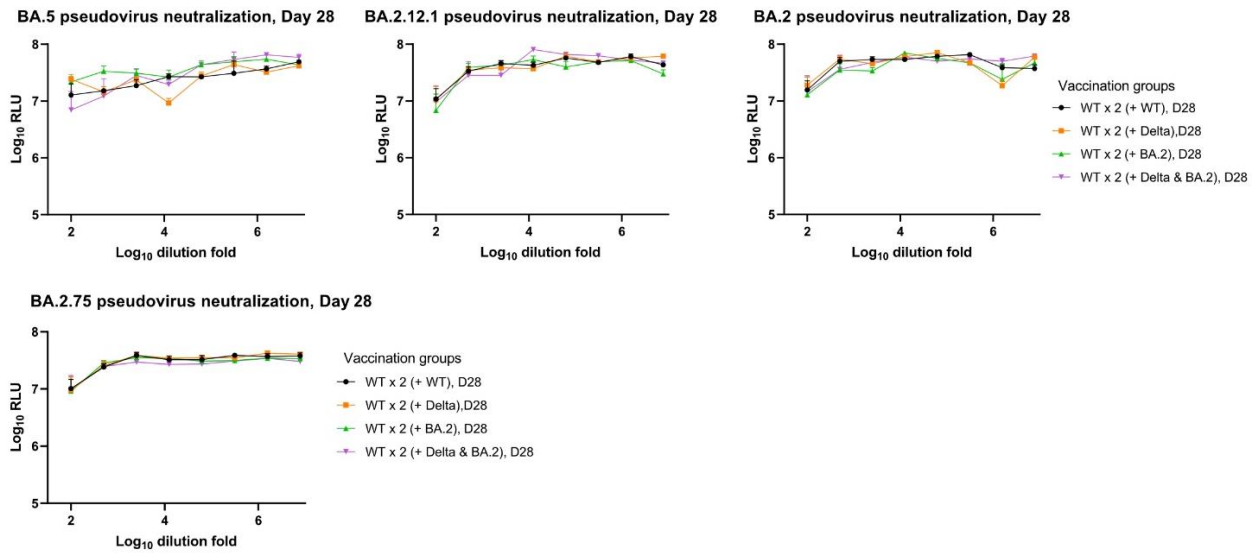

**c**

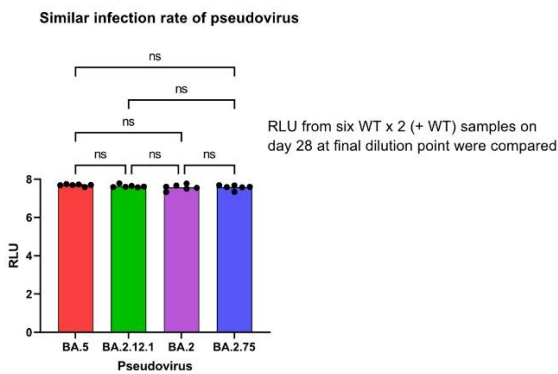

**d**

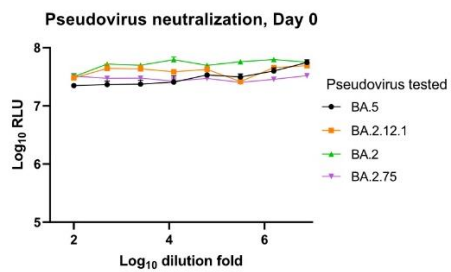

84 **Supplementary Figure S7. Neutralization titration curves of serially diluted plasma collected at indicated**  
85 **time points from mice vaccinated with WT, Delta, BA.2 monovalent or bivalent LNP-mRNA boosters.**

86 **a**, Neutralization curves of BA.5, BA.2.12.1, BA.2.75 and BA.2 pseudovirus by samples collected on day 42  
87 from mice immunized with 1.5 µg WT, Delta, BA.2 monovalent or bivalent LNP-mRNA boosters.

88 **b**, Neutralization curves of BA.5, BA.2.12.1, BA.2.75 and BA.2 pseudovirus by samples collected on day 28  
89 from mice immunized with two doses of 1.5 µg WT LNP-mRNA.

90 **c**, RLUs of six WT x 2 (+ WT) samples on day 28 at the last dilution point ( $10^{6.9}$  dilution) were compared  
91 among four pseudovirus neutralization assays. RLUs or infection rates of BA.5, BA.2.12.1, BA.2.75 and  
92 BA.2 pseudovirus were similar.

93 **d**, Neutralization curves of BA.5, BA.2.12.1, BA.2.75 and BA.2 pseudovirus by samples collected on day 0  
94 from vaccination naïve mice.

95 The  $\log_{10}$  relative light unit (RLU) measured by NanoLuc luciferase assay were shown as mean  $\pm$  s.e.m. and  
96 plotted against serial  $\log_{10}$ -transformed sample dilution points.

97

98

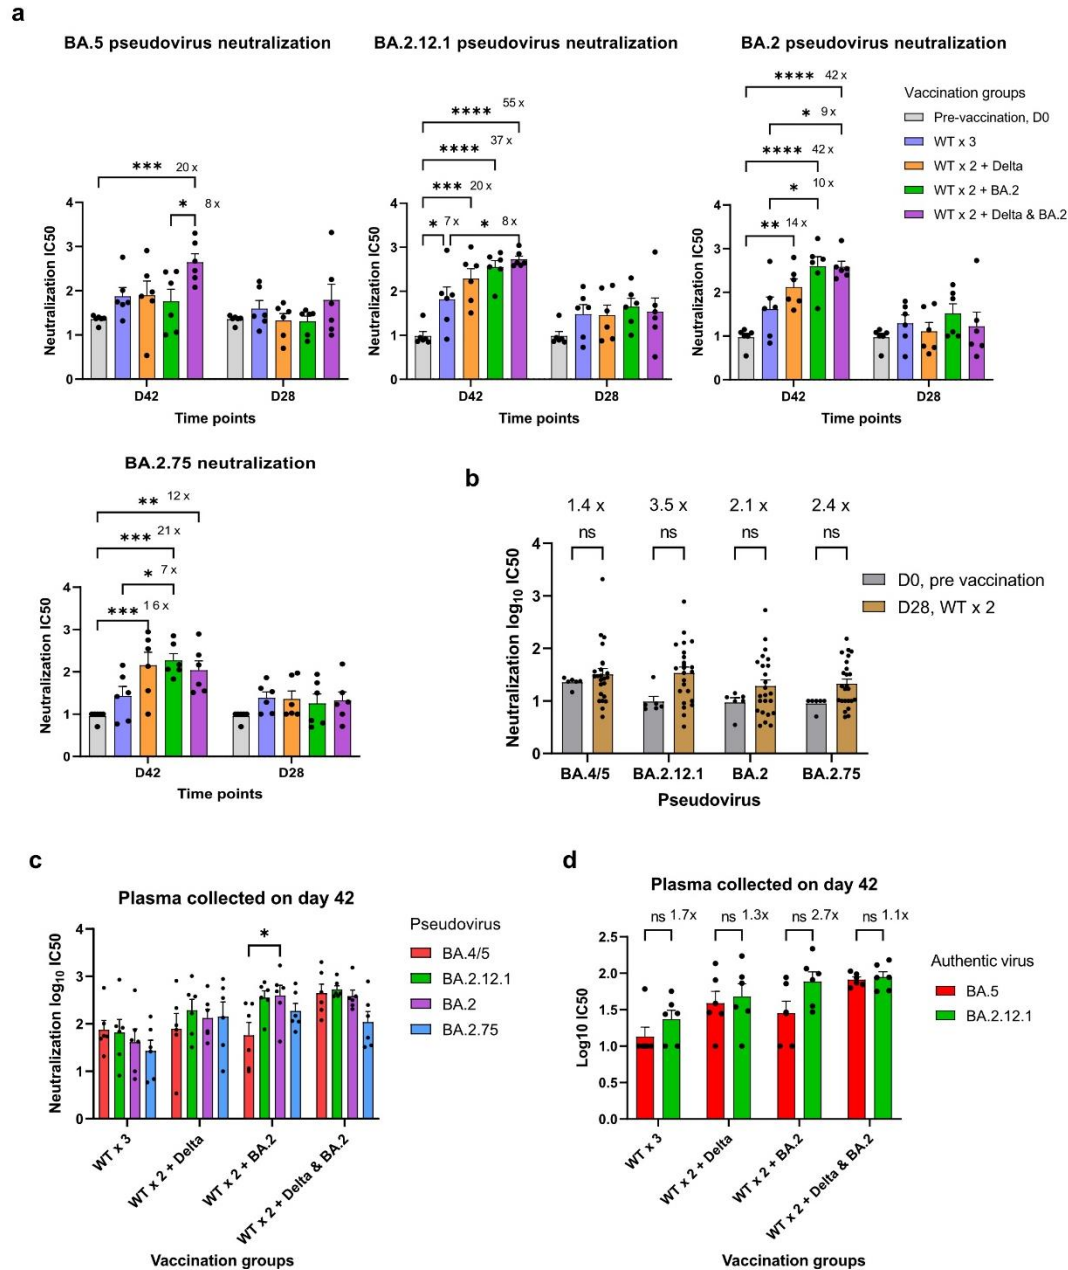

99

100 **Supplementary Figure S8. Statistical comparison of neutralizing titers of plasma samples from different**  
 101 **vaccination groups at same time point (a, c, d) or against different Omicron subvariant pseudoviruses**  
 102 **at matched time points (b).**

103 **a,** Omicron BA.2 (right), BA.2.12.1 (mid), BA.5 (left) and BA.2.75 (second row) pseudovirus neutralization  
 104 by plasma of mice before (D28) and after (D42) vaccinated with WT, Delta, BA.2 specific monovalent or  
 105 Delta & BA.2 bivalent boosters. Six samples collected on day 0 were included and compared to both D28  
 106 and D42 datasets.

107 **b**, BA.4/5, BA.2.12.1, BA.2.75 and BA.2 neutralizing antibody titers from samples collected on day 0 and  
108 day 28 (WT x 2) were compared.

109 **c**, BA.4/5, BA.2.12.1, BA.2.75 and BA.2 pseudovirus neutralizing antibody titers were compared within  
110 same vaccination groups at the same time on day 42 (post booster).

111 **d**, BA.4/5 and BA.2.12.1 authentic virus neutralizing antibody titers were compared within same  
112 vaccination groups at the same time on day 42 (post booster).

113

a

RBD neutralization correlations of BA.2, BA.2.12.1, BA4/5

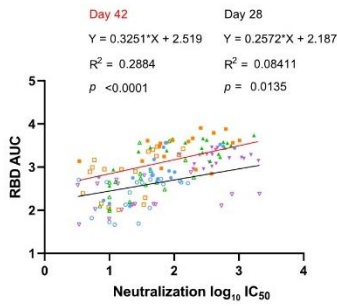

ECD neutralization correlations of BA.2, BA.2.12.1, BA4/5

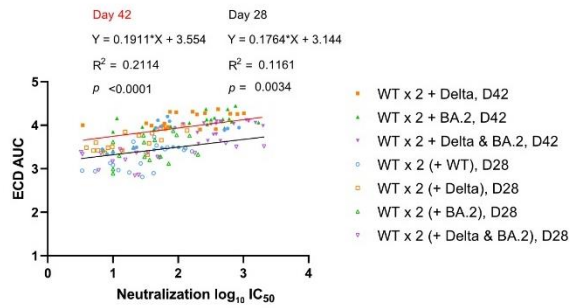

b

RBD neutralization correlations of BA.2, BA.2.12.1, BA4/5

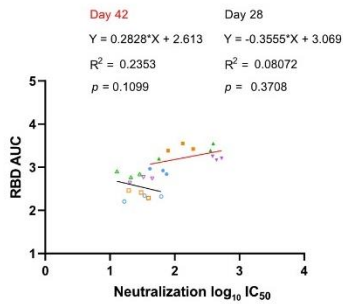

ECD neutralization correlations of BA.2, BA.2.12.1, BA4/5

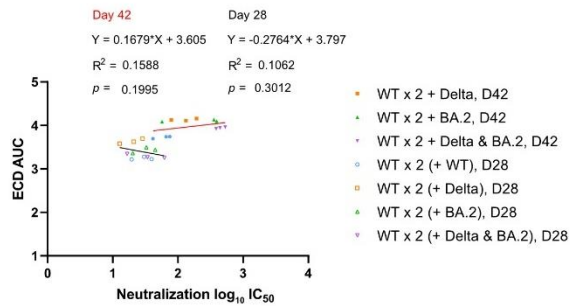

114

115 **Supplementary Figure S9. Correlation of antibody titers measured by pseudovirus neutralization and**  
 116 **ELISA.** Antibody titers determined by pseudovirus neutralization assay were shown on x axis as  $\log_{10}$  IC50  
 117 and plotted against ELISA binding antibody titers ( $\log_{10}$  AUC) measured by RBD (left) or ECD (right) spike  
 118 antigens on y axis. Titer values were either derived from mean of matched vaccination group (b) or  
 119 individual animals (a).

120

121

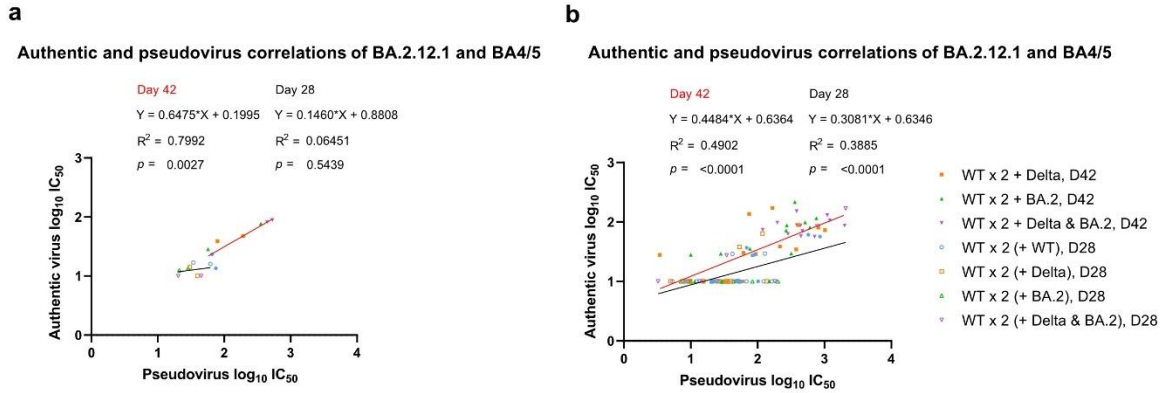

122

123

124

125

126

**Supplementary Figure S10. Correlation of antibody titers measured by pseudovirus and authentic virus neutralization.** Antibody titers determined by pseudovirus and authentic virus neutralization assays were shown on x axis as pseudovirus  $\log_{10}$  IC<sub>50</sub> and plotted against authentic virus neutralizing titers (y axis). Titer values were either derived from mean of matched vaccination group (a) or individual animals (b).

**127 Methods****128 Institutional approval**

129 All animal work was performed under the guidelines of Yale University Institutional Animal Care and Use  
130 Committee (IACUC) with approved protocols (Chen 2020-20358; Chen 2021-20068). All recombinant DNA  
131 (rDNA) and biosafety work were performed under the guidelines of Yale Environment, Health and Safety  
132 (EHS) Committee with approved protocols (Chen 18–45, 20–18, and 20–26). The Yale Human Research  
133 Protection Program Institutional Review Board determined that the sequencing and generating a virus  
134 isolate from de-identified remnant COVID-19 clinical samples conducted in this study were not research  
135 involving human participants (IRB protocol ID 2000028599).

136

**137 Molecular cloning and mRNA preparation**

138 The WT and Delta spike plasmids were cloned in our previous study<sup>4,5</sup>. BA.2 spike plasmid was cloned  
139 based on the isolate sequencing data in GISAID EpiCoV (EPI\_ISL\_6795834.2)<sup>6</sup>. WT, Delta and BA.2 spike  
140 plasmids were linearized by restriction enzymes and transcribed to mRNA by in vitro T7 RNA polymerase  
141 (NEB, Cat # E2060S) as previously described<sup>5</sup>.

142

**143 Cell culture**

144 hACE2-293FT and 293T cells were cultured in Dulbecco's minimal essential medium (DMEM, Fisher)  
145 supplemented with 10% fetal bovine serum (Hyclone) and penicillin (100 U/ml)-streptomycin (100 ug/ml).  
146 Cells were split ever other day at a 1:4 ratio when confluency is over 90%.

147

**148 Lipid nanoparticle mRNA preparation**

149 In brief, lipids mixture was solubilized in ethanol and mixed with spike mRNA in pH 5.2 sodium acetate  
150 buffer. The lipids mixture contains ALC-0315, ALC-0159, DSPC and cholesterol at a mixing ratio of  
151 46.3:1.6:9.4:42.7 as previously described<sup>5</sup>. The mRNA encapsulated by LNP (LNP-mRNA) was then buffer  
152 exchanged to PBS using 100kDa Amicon filter (Macrosep Centrifugal Devices 100K, 89131-992). The size  
153 distribution of LNP-mRNA was evaluated by dynamic light scatter (DynaPro NanoStar, Wyatt, WDPN-06).

154 The Quant-iT™ RiboGreen™ (Thermo Fisher) RNA Assay was applied to determine encapsulation rate and  
155 mRNA amount.

156

### 157 **Animal vaccination**

158 Animal immunization was performed on 16-18 weeks female C57BL/6Ncr mice purchased from Charles  
159 River. Mice were vaccinated with two doses of 1.5 µg WT LNP-mRNA on day 0 and day 14 followed by 1.5  
160 µg WT, Delta, Omicron BA.2 monovalent booster or Delta & BA.2 bivalent booster on day 29. The plasma  
161 samples were isolated from blood which was collected before vaccination on day 0, two weeks after WT  
162 boost on day 28 and two weeks after monovalent or bivalent boosters on day 42.

163

### 164 **ELISA and Neutralization assay**

165 The binding and neutralizing antibody titers were determined by ELISA and pseudovirus neutralization  
166 assay as previously described<sup>5</sup>. NanoGlo luciferase assay system (Promega N1120) was applied to  
167 determine the pseudovirus infection level in hACE2-293FT cells. The ELISA antigens including RBDs of WT  
168 (Sino 40592-V08B), Delta(Sino 40592-V08H90), Omicron BA.2(Acro SPD-C522g-100ug), BA.2.12.1(Acro  
169 SPD-C522q-100ug) and BA.4/5(Acro SPD-C522r-100ug) were purchased from Sino Biological and  
170 AcroBiosystems. The ELISA ECD antigens including WT (Sino 40589-V08B1), Delta (Sino 40589-V08B16),  
171 Omicron BA.2 (Acro SPN-C5223-50ug), BA.2.12.1 (Acro SPN-C522d-50ug) and BA.4/5 (SPN-C5229-50ug)  
172 were purchased from Sino Biological and AcroBiosystems. The pseudovirus plasmids of spike without  
173 HexaPro mutations were generated based on the WT plasmid which was a gift from Dr. Bieniasz's lab. The  
174 pseudovirus titers were quantified by measuring the GFP positive rate and NanoLuc activity when  
175 different volume of virus supernatant was added (**Supplementary Fig. S6**). Because of better linear  
176 regression fitting, the linear model from GFP dataset was used to normalize all pseudoviruses to ensure  
177 similar infection rate of different pseudoviruses. After model fitting, the derived Log<sub>10</sub> IC<sub>50</sub> value in  
178 pseudovirus neutralization less than 0.5 is converted to 1.

179

### 180 **Authentic virus neutralization**



181 The mouse plasma was heat inactivated prior to infectious virus neutralization assay in order to remove  
 182 complements and other potential neutralizing agents. Mouse plasma samples were serially diluted, then  
 183 incubated with SARS-CoV-2 Omicron BA.2.12.1 or BA.5 infectious virus for 1 h at 37 °C. The Omicron  
 184 BA.2.12.1 and BA.5 authentic viruses were isolated from nasopharyngeal specimens and sequenced as  
 185 part of the Yale SARS-CoV-2 Genomic Surveillance Initiative's weekly surveillance Program in Connecticut.  
 186 After coincubation, plasma/virus mixture was added to Vero-E6 cells overexpressing ACE2/TMPRSS2. Cell  
 187 viability was measured at 3dpi or 5dpi using CellTiter Glo<sup>6</sup>.

188

### 189 **Statistics**

190 For grouped bar statistical analysis in Figure 1 and S3-S4, Individual dot in dot-bar plots represents value  
 191 from each mouse and is shown as mean  $\pm$  s.e.m.. To assess statistical significance, two-way ANOVA with  
 192 Tukey's or Šídák's multiple comparisons test was used. Statistical significance labels: \*  $p < 0.05$ ; \*\*  $p <$   
 193  $0.01$ ; \*\*\*  $p < 0.001$ ; \*\*\*\*  $p < 0.0001$ . Non significant comparisons are not shown. The statistical analysis  
 194 of each comparison was included in the Supplementary Table S1 excel file.

195

### 196 **Data availability**

197 All source data and statistical analysis are provided in this article and its supplementary excel file.

198

### 199 **Code availability**

200 No custom code was used in this study.

201

### 202 **Protein sequence of WT HexaPro spike**

203 MFVFLVLLPLVSSQCVNLTRTQLPPAYTNSFTRGVVYPDKVFRSSVLHSTQDLFLPFFSNVTWFHAIHVSGTNGTKRFD  
 204 NPVLPFNDGVYFASTEKSNIIIRGWIFGTTLDLSDKTSLLIVNATNVVIVKCEFCNDPFLGVVYHKNNKSWMESEFRVY  
 205 SSANNCTFEYVSQPFLMDLEGKQGNFKNLREFVFNIDGYFKIYSKHTPINLVRDLPPQGFSALEPLVDLPIGINITRFQTL  
 206 ALHRSYLTPGDSSSGWTAGAAAYVGYLQPRFTLLKYNENGTITDAVDCALDPLSETKCTLKSFTVEKGIYQTSNFRVQP  
 207 TESIVRFPNITNLCPFGEVFNATRFASVYAWNRKRISNCVADYSVLYNSASFSTFKCYGVSPTKLNLCFTNVYADSFVIR  
 208 GDEVQRQIAPGQTGKIADYNYKLPDDFTGCVIAWNSNNLDSKVGNGYNYLYRLFRKSNLKPFRDISTEIQAGSTPCNG  
 209 VEGFNCYFPLQSYGFQPTNGVGYQPYRVVLSFELLHAPATVCGPKKSTNLVKNKCVNFNGLTGTGVLTESNKKFLP  
 210 FQQFGRDIADTTDAVRDPQTLEILDITPCSFGGVSVITPGTNTSNQVAVLYQDVNCTEVPVAIHADQLTPTWRVYSTGS

211 NVFQTRAGCLIGAEHVNNSYECDIPIGAGICASYQTQTNSPGSASSVASQSIIAYTMSLGAENSVAYSNNNSIAIPTNFTISV  
 212 TTEILPVSMTKTSVDCTMYICGDSTECNSLLLQYGSFCTQLNRALTGIAVEQDKNTQEVFAQVKQIYKTPPIKDFGGFNFS  
 213 QILPDPSKPSKRSPIEDLLFNKVTADAGFIKQYGDCLGDIARDLCAQKFNGLTVLPPLLTDEMIAQYTSALLAGTITSG  
 214 WTFGAGPALQIPFPMQMAYRFNGIGVTQNVLYENQKLIANQFNNSAIGKIQDLSSTPSALGKLQDVVNQNAQALNTL  
 215 VKQLSSNFGAISSVLNDILSRLDPPEAEVQIDRLITGRLQSLQTYVTQQLIRAAEIRASANLAATKMSECVLGQSKRVDFC  
 216 GKGYHLMSFPQSAPHGVVFLHVTYVPAQEKNFTTAPAICHGKAHFPREGVFSNGTHWFVTQRNFYEPQIITDNTNF  
 217 VSGNCDVVIGIVNNTVYDPLQPELDSFKEELDKYFKNHTSPDVLGDISGINASVVNIQKEIDRLNEVAKNLNESLIDLQE  
 218 LGKYEQYIKWPWYIWLGFIAGLIAIVMVTIMLCCMTSCCSCCKGCCSCGSCCKFDEDDSEPVKGVKLYHT\*

219

#### 220 Protein sequence of Delta HexaPro spike

221 MFVFLVLLPLVSSQCVNLRTRTQLPPAYTNSFTRGVVYYPDKVFRSSVLHSTQDLFLPFFSNVTWFHAIHVSGTNGTKRFD  
 222 NPVLPFNDGVYFASTEKSNIIRGWIFGTTLDSTQSLIVNNTANNVVIKVEFCQFCNDPFLDVVYHKNKNSWMESGVYSS  
 223 ANNCTFEYVSQPFLMDLEGKQGNFKNLREFVFKNIDGYFKIYSKHTPINLVRDLPGGFSALEPLVDLPIGINITRFQTLAL  
 224 HRSYLTGDSSSGWTAGAAAYVGYLQPRTFLLKYNENGTITDAVDCALDPLSETKCTLKSTVEKGIYQTSNFRVQPT  
 225 SIVRFPNITNLCPFGEVFNATRFASVYAWNRKRISNCVADYSVLYNSASFSTFKCYGVSPKLNLCFTNVYADSFVIRGD  
 226 EVRQIAPGQTGKIADYNYKLPDDFTGCVIAWNSNNLDSKVGGNYNRYRFLFRKSNLKPFERDISTEIQAGSKPCNGVE  
 227 GFNCYFPLQSYGFQPTNGVGYQPYRVVLSFELLHAPATVCGPKKSTNLVKNKCVNFNFNGLTGTGVLTESNKKFLPFQ  
 228 QFGRDIADTTDAVRDPQTLILDITPCSFGGVSVITPGTNTSNQVAVLYQGVNCTEVPVAIHADQLTPTWRVYSTGSNV  
 229 FQTRAGCLIGAEHVNNSYECDIPIGAGICASYQTQTNRSRGSASSVASQSIIAYTMSLGAENSVAYSNNNSIAIPTNFTISVTT  
 230 EILPVSMTKTSVDCTMYICGDSTECNSLLLQYGSFCTQLNRALTGIAVEQDKNTQEVFAQVKQIYKTPPIKDFGGFNFSQI  
 231 LPDPSKPSKRSPIEDLLFNKVTADAGFIKQYGDCLGDIARDLCAQKFNGLTVLPPLLTDEMIAQYTSALLAGTITSGWT  
 232 FGAGPALQIPFPMQMAYRFNGIGVTQNVLYENQKLIANQFNNSAIGKIQDLSSTPSALGKLQNVVNQNAQALNTLVKQ  
 233 LSSNFGAISSVLNDILSRLDPPEAEVQIDRLITGRLQSLQTYVTQQLIRAAEIRASANLAATKMSECVLGQSKRVDFCGKGY  
 234 HLMSFPQSAPHGVVFLHVTYVPAQEKNFTTAPAICHGKAHFPREGVFSNGTHWFVTQRNFYEPQIITDNTNFVSGN  
 235 CDVVIGIVNNTVYDPLQPELDSFKEELDKYFKNHTSPDVLGDISGINASVVNIQKEIDRLNEVAKNLNESLIDLQELGKYE  
 236 QYIKWPWYIWLGFIAGLIAIVMVTIMLCCMTSCCSCCKGCCSCGSCCKFDEDDSEPVKGVKLYHT\*

237

#### 238 Protein sequence of BA.2 HexaPro spike

239 MFVFLVLLPLVSSQCVNLITRTQSYTNSFTRGVVYYPDKVFRSSVLHSTQDLFLPFFSNVTWFHAIHVSGTNGTKRFDNPV  
 240 LPFNDGVYFASTEKSNIIRGWIFGTTLDSTQSLIVNNTANNVVIKVEFCQFCNDPFLDVVYHKNKNSWMESEFRVYSSA  
 241 NNCTFEYVSQPFLMDLEGKQGNFKNLREFVFKNIDGYFKIYSKHTPINLGRDLPGGFSALEPLVDLPIGINITRFQTLALH  
 242 RSYLTGDSSSGWTAGAAAYVGYLQPRTFLLKYNENGTITDAVDCALDPLSETKCTLKSTVEKGIYQTSNFRVQPTESI  
 243 VRFPNITNLCPFDEVFNATRFASVYAWNRKRISNCVADYSVLYNFAPFFAFKCYGVSPKLNLCFTNVYADSFVIRGNE  
 244 VSQIAPGQTGNIADYNYKLPDDFTGCVIAWNSNKLDSKVGGNYNRYRFLFRKSNLKPFERDISTEIQAGNKPCNGVAG  
 245 FNCYFPLRSYGFRTYGVGHQPYRVVLSFELLHAPATVCGPKKSTNLVKNKCVNFNFNGLTGTGVLTESNKKFLPFQFQ  
 246 GRDIADTTDAVRDPQTLILDITPCSFGGVSVITPGTNTSNQVAVLYQGVNCTEVPVAIHADQLTPTWRVYSTGSNVFQ  
 247 TRAGCLIGAEYVNSYECDIPIGAGICASYQTQTKSHRRARSVASQSIIAYTMSLGAENSVAYSNNNSIAIPTNFTISVTTTEIL  
 248 PVSMTKTSVDCTMYICGDSTECNSLLLQYGSFCTQLKRALTGIAVEQDKNTQEVFAQVKQIYKTPPIKYFGGFNFSQILP  
 249 DPSKPSKRSPIEDLLFNKVTADAGFIKQYGDCLGDIARDLCAQKFNGLTVLPPLLTDEMIAQYTSALLAGTITSGWTFG  
 250 AGPALQIPFPMQMAYRFNGIGVTQNVLYENQKLIANQFNNSAIGKIQDLSSTPSALGKLQDVVNHNNAQALNTLVKQLS  
 251 SKFGAISSVLNDILSRLDPPEAEVQIDRLITGRLQSLQTYVTQQLIRAAEIRASANLAATKMSECVLGQSKRVDFCGKGYHL

252 MSFPQSAPHGVVFLHVTVVPAQEKNFTTAPAICHGKAHFPREGVFVSNQTHWFVTQRNFYEPQIITDNTFVSGNCD  
253 VVIGIVNNTVYDPLQPELDSFKEELDKYFKNHTSPDVDLGDISGINASVVNIQKEIDRLNEVAKNLNESLIDLQELGKYEY  
254 IKWPWYIWLGFIAGLIAIVMVTIMLCCMTSCCCKGSCGSCCKFDEDDSEPVKGVKLYHT\*

255

256 **References**

257

- 258 1 Payne, R. P. *et al.* Immunogenicity of standard and extended dosing intervals of BNT162b2  
259 mRNA vaccine. *Cell* **184**, 5699-5714 e5611, doi:10.1016/j.cell.2021.10.011 (2021).
- 260 2 Hall, V. G. *et al.* Delayed-interval BNT162b2 mRNA COVID-19 vaccination enhances humoral  
261 immunity and induces robust T cell responses. *Nat Immunol* **23**, 380-385, doi:10.1038/s41590-  
262 021-01126-6 (2022).
- 263 3 Tegally, H. *et al.* Emergence of SARS-CoV-2 Omicron lineages BA.4 and BA.5 in South Africa. *Nat*  
264 *Med*, doi:10.1038/s41591-022-01911-2 (2022).
- 265 4 Peng, L. *et al.* Variant-specific vaccination induces systems immune responses and potent in vivo  
266 protection against SARS-CoV-2. *Cell Rep Med* **3**, 100634, doi:10.1016/j.xcrm.2022.100634  
267 (2022).
- 268 5 Fang, Z. *et al.* Omicron-specific mRNA vaccination alone and as a heterologous booster against  
269 SARS-CoV-2. *Nat Commun* **13**, 3250, doi:10.1038/s41467-022-30878-4 (2022).
- 270 6 Fang, Z. *et al.* Heterotypic vaccination responses against SARS-CoV-2 Omicron BA.2. *Cell Discov*  
271 **8**, 69 (2022)

272
